# Supplementary material
Source: PubMed Central journal article supplement (PMC4548262)

*Supporting Information to Accompany:*

**Binding-induced, turn-on fluorescence of the EGFR/ERBB kinase inhibitor, lapatinib**

*James N. Wilson,<sup>a</sup> Wenjun Liu,<sup>b</sup> Adrienne S. Brown<sup>a</sup> and Ralf Landgraf<sup>b</sup>*

<sup>a</sup> Department of Chemistry, University of Miami, 1301 Memorial Drive,  
Coral Gables, Florida 33124, United States

<sup>b</sup> Department of Biochemistry and Molecular Biology, University of  
Miami, Miami, Florida 33101-6129, United States

|                                                                                                  |    |
|--------------------------------------------------------------------------------------------------|----|
| <b>Table S1.</b> Atomic coordinates of lapatinib fragment from PDB ID 1XKK .....                 | S2 |
| <b>Figure S1.</b> Lapatinib-treated cells costained for ERBB2 .....                              | S3 |
| <b>Figure S2.</b> 2-photon confocal microscope image of BT474 cells treated with lapatinib ..... | S3 |

**Table S1.** Atomic coordinates of lapatinib fragment from PDB ID 1XKK.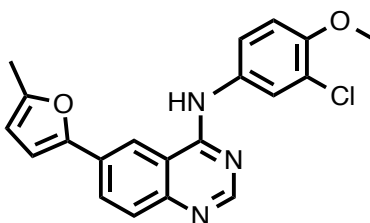

| Atom # | Atom | X         | Y         | Z         |
|--------|------|-----------|-----------|-----------|
| 1      | C    | -4.888871 | -4.07038  | 0.024331  |
| 2      | C    | -5.195525 | -2.61766  | 0.115972  |
| 3      | C    | -6.342844 | -1.90129  | 0.232618  |
| 4      | C    | -5.96931  | -0.523617 | 0.22425   |
| 5      | C    | -4.613289 | -0.488995 | 0.105711  |
| 6      | O    | -4.134419 | -1.767523 | 0.03604   |
| 7      | C    | -3.636675 | 0.590012  | 0.045463  |
| 8      | C    | -4.06119  | 1.939779  | 0.156685  |
| 9      | C    | -3.167047 | 2.970651  | 0.077436  |
| 10     | C    | -1.788251 | 2.714838  | -0.104888 |
| 11     | N    | -0.926615 | 3.76782   | -0.20696  |
| 12     | C    | 0.326618  | 3.454714  | -0.388527 |
| 13     | N    | 0.879579  | 2.22098   | -0.443423 |
| 14     | C    | 0.064858  | 1.196733  | -0.332179 |
| 15     | N    | 0.592033  | -0.069665 | -0.400714 |
| 16     | C    | 2.00333   | -0.300905 | -0.37667  |
| 17     | C    | 2.653631  | -0.684991 | -1.53744  |
| 18     | C    | 4.01863   | -0.955442 | -1.526925 |
| 19     | C    | 4.750473  | -0.846056 | -0.34728  |
| 20     | O    | 6.072812  | -1.086981 | -0.247552 |
| 21     | C    | 6.741931  | -1.553561 | -1.398891 |
| 22     | C    | 4.08148   | -0.45342  | 0.822176  |
| 23     | Cl   | 4.977031  | -0.308037 | 2.307392  |
| 24     | C    | 2.727803  | -0.181152 | 0.808341  |
| 25     | C    | -1.355176 | 1.37529   | -0.187472 |
| 26     | C    | -2.293343 | 0.326484  | -0.12789  |
| 27     | H    | -3.888264 | -4.268475 | 0.415095  |
| 28     | H    | -5.60703  | -4.655313 | 0.603113  |
| 29     | H    | -7.341358 | -2.30471  | 0.314352  |
| 30     | H    | -6.631882 | 0.32567   | 0.300441  |
| 31     | H    | -5.115266 | 2.15215   | 0.298712  |
| 32     | H    | -3.481561 | 4.005583  | 0.147322  |
| 33     | H    | 1.030002  | 4.277291  | -0.486835 |
| 34     | H    | 0.028405  | -0.793627 | 0.019793  |
| 35     | H    | 2.086358  | -0.770958 | -2.457022 |
| 36     | H    | 4.510978  | -1.249416 | -2.445115 |
| 37     | H    | 7.783011  | -1.684035 | -1.106841 |
| 38     | H    | 6.332399  | -2.513554 | -1.732556 |
| 39     | H    | 2.237098  | 0.13555   | 1.720957  |
| 40     | H    | -1.979621 | -0.703987 | -0.245492 |
| 41     | H    | 6.683637  | -0.830613 | -2.220594 |
| 42     | H    | -4.921959 | -4.429036 | -1.010165 |

**Figure S1.** Methanol fixed MCF7 cells stained with mouse anti-ERBB2 and labeled with goat anti-mouse Alexa 546 (red channel) then exposed to lapatinib (green channel). The two channels are spatially segregated with virtually no overlap observed.

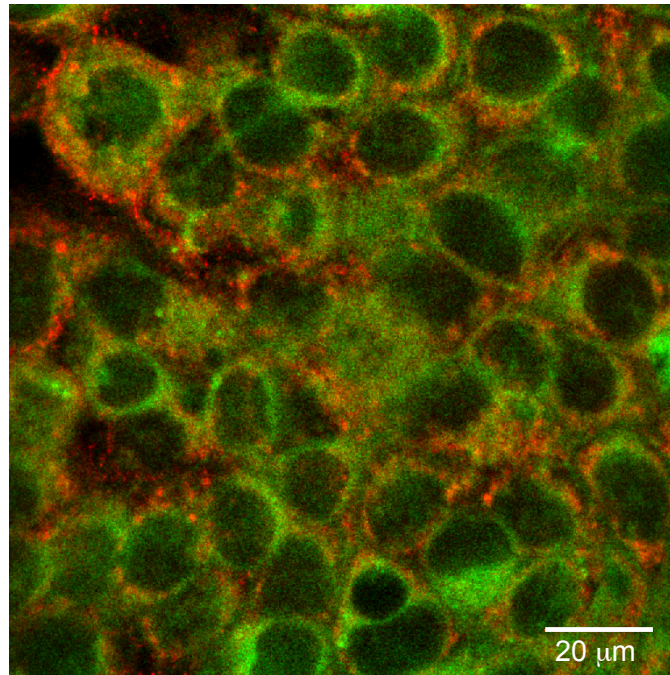

**Figure S2.** Two-photon (765 nm excitation) confocal microscopy of BT474 cells treated with lapatinib; only a perinuclear, cytosolic pool is observed.

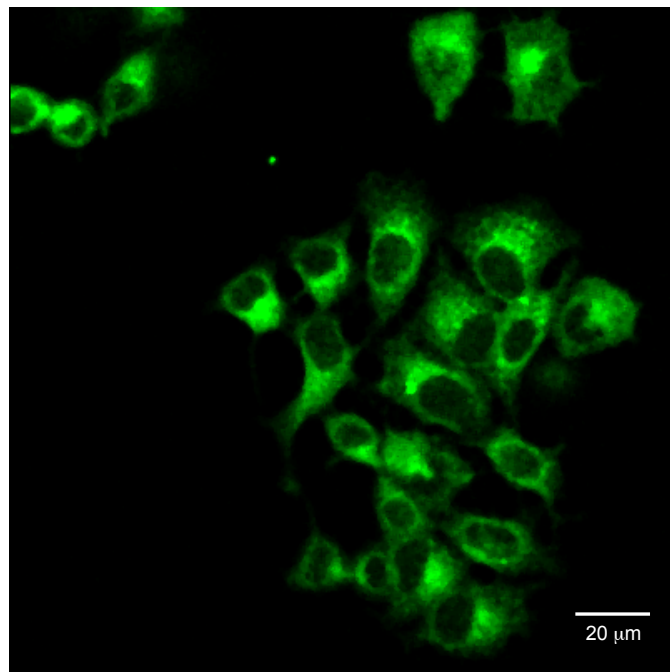

Supplement: NIHMS715176-supplement-Supplemental_Information_File.pdf [file NIHMS715176-supplement-Supplemental_Information_File.pdf]
